# Supplementary material
Source: publisher figshare collection journal article supplement (https://acs.figshare.com/ndownloader/files/8342708)
Supplement: Supplementary file 1 [file 8342708]

## **Supporting Information**

**of**

### **A green and sustainable technology for high-efficiency and low-damage manipulation of densely crosslinked proteins**

Helan Xu,<sup>†</sup> Kaili Song,<sup>†,‡</sup> Bingnan Mu,<sup>†</sup> Yiqi Yang<sup>\*,†,‡,§</sup>

<sup>†</sup>Department of Textiles, Merchandising and Fashion Design, 234, HECO Building, University of Nebraska-Lincoln, Lincoln, NE 68583-0802, United States

<sup>‡</sup>Key Laboratory of Science and Technology of Eco-Textiles, Ministry of Education, Donghua University, Shanghai 201620, China

<sup>‡</sup>Department of Biological Systems Engineering, 234, HECO Building, University of Nebraska-Lincoln, Lincoln, NE 68583-0802, United States

<sup>§</sup>Nebraska Center for Materials and Nanoscience, 234, HECO Building, University of Nebraska-Lincoln, Lincoln, NE 68583-0802, United States

\* Corresponding Author. Tel: +001 402 472 5197; Fax: +001 402 472 0640; E-mail: [yyang2@unl.edu](mailto:yyang2@unl.edu)

Table S1 demonstrates the difference in potential hazards of active ingredients of the commercial product used in this research and those of our product. It could be seen that the chemicals used in the developed formula showed less potential harm comparing to those used in the commercial product.

**Table S1.** Comparison of active ingredients in commercial product and our formula

| Chemical           |                        | Potential hazard                                                                                                                                                                                                                                                                                                                                                                                                                                                                                         | Source                                                                                                                                                                                                                                                                                                                    |
|--------------------|------------------------|----------------------------------------------------------------------------------------------------------------------------------------------------------------------------------------------------------------------------------------------------------------------------------------------------------------------------------------------------------------------------------------------------------------------------------------------------------------------------------------------------------|---------------------------------------------------------------------------------------------------------------------------------------------------------------------------------------------------------------------------------------------------------------------------------------------------------------------------|
| Commercial product | Hydrogen peroxide      | Eye: Produces irritation, characterized by a burning sensation, redness, tearing, inflammation, and possible corneal injury. Vapors may cause eye irritation.<br>Skin: May cause skin irritation. May cause skin discoloration. May cause reddening of the skin.<br>Ingestion: May cause irritation of the digestive tract. May lead to distention of the esophagus and stomach.<br>Inhalation: May cause respiratory tract irritation. Irritation may lead to chemical pneumonitis and pulmonary edema. | <a href="https://fscimage.fishersci.com/msds/40069.htm">https://fscimage.fishersci.com/msds/40069.htm</a>                                                                                                                                                                                                                 |
|                    | Ammonium thioglycolate | The material can produce chemical burns to the eye following direct contact. Vapors or mists may be extremely irritating. If applied to the eyes, this material causes severe eye damage.<br>Inhalation of thioglycolic acid mists may cause olfactory paralysis, weakness, shortness of breath and liver damage.                                                                                                                                                                                        | <a href="http://datasheets.scbt.com/sc-251234.pdf">http://datasheets.scbt.com/sc-251234.pdf</a>                                                                                                                                                                                                                           |
|                    | Ammonium hydroxide     | The substance is corrosive to the eyes, the skin and the respiratory tract. Corrosive on ingestion as well. Inhalation of high concentrations of vapor may cause laryngeal oedema, inflammation of the respiratory tract, and pneumonia. The effects may be delayed.<br>Lungs may be affected by repeated or prolonged exposure to the vapor or aerosol.                                                                                                                                                 | <a href="https://www.cdc.gov/niosh/ipcsneng/neng0215.html">https://www.cdc.gov/niosh/ipcsneng/neng0215.html</a>                                                                                                                                                                                                           |
| Our product        | Cysteine               | Cause skin irritation<br>Cause serious eye irritation<br>May cause respiratory irritation                                                                                                                                                                                                                                                                                                                                                                                                                | <a href="https://www.fishersci.com/shop/msdsproxy?productName=C56225&amp;productDescription=L+CYS TEINE+HCL+REAGENT+25G&amp;catNo=C562-25&amp;vendorId=VN00033">https://www.fishersci.com/shop/msdsproxy?productName=C56225&amp;productDescription=L+CYS TEINE+HCL+REAGENT+25G&amp;catNo=C562-25&amp;vendorId=VN00033</a> |

|  |                      |                                                                                                                                                |                                                                                                                                                                                                                                                                                                        |
|--|----------------------|------------------------------------------------------------------------------------------------------------------------------------------------|--------------------------------------------------------------------------------------------------------------------------------------------------------------------------------------------------------------------------------------------------------------------------------------------------------|
|  |                      |                                                                                                                                                | 897&storeId=10652                                                                                                                                                                                                                                                                                      |
|  | Urea                 | The substance irritates the eyes, the skin and the respiratory tract.<br>Repeated or prolonged contact with skin may cause dermatitis.         | <a href="https://www.cdc.gov/niosh/ipcsneng/neng0595.html">https://www.cdc.gov/niosh/ipcsneng/neng0595.html</a>                                                                                                                                                                                        |
|  | Citric acid          | The substance is irritating to the eyes, the skin and the respiratory tract .                                                                  | <a href="https://www.cdc.gov/niosh/ipcsneng/neng0855.html">https://www.cdc.gov/niosh/ipcsneng/neng0855.html</a>                                                                                                                                                                                        |
|  | Sodium hypophosphite | Decomposes at high temperatures (>248 °C) generating flammable and toxic phosphine gas. May cause eye, skin, and respiratory tract irritation. | <a href="https://fscimage.fishersci.com/msds/21325.htm">https://fscimage.fishersci.com/msds/21325.htm</a><br><a href="http://www.dcfinechemicals.com/files2/Hojas%20de%20seguridad%20(EN)/111780-SDS-EN.pdf">http://www.dcfinechemicals.com/files2/Hojas%20de%20seguridad%20(EN)/111780-SDS-EN.pdf</a> |
